# ABSTRACTS

## Presented at the 30<sup>th</sup> Annual Meeting of the American Neuropsychiatric Association

March 20-23, 2019

The Westin Michigan Avenue

Chicago, ILLINOIS

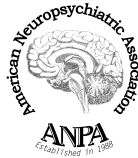

### ANPA Executive Committee

#### President

Robin A. Hurley, MD, FANPA

#### Immediate Past President

John J. Campbell, MD, FANPA

#### President Elect

Kaloyan Tanev, MD, FANPA

#### Treasurer

C. Edward Coffey, MD, FANPA

### ANPA Scientific Program Committee Members and Reviewers

#### Chair: Kaloyan Tanev, MD, FANPA

Kevin Black, MD, FANPA

Nash Boutros, MD

Joan Camprodon, MD, PhD

Zeima Chemali, MD

Donald Eknoyan, MD, FANPA

Manish Fozdar, MD

Omar Ghaffar, MD, MSc,

FRCPC, FANPA

Eric Goldwasser, MD

Daniel Kaufer, MD, FANPA

Paul Malloy, PhD.

Richard Ronan Murphy, MD

Nicholas Nunez, MD

Ricardo Salazar, MD

Jeremiah Scharf, MD, PhD

Barbara Schildkrout, MD,

FANPA

Katherine Taber, PhD, FANPA

## Awards Presented at the 2019 Annual Meeting

### **Gary J. Tucker, MD Lifetime Achievement Award in Neuropsychiatry**

Established in his memory, the Gary J. Tucker, MD Award in Neuropsychiatry is the highest honor bestowed by ANPA and is presented to an individual who has demonstrated sustained commitment and service to ANPA and whose career has best exemplified the professional and personal values of Dr. Tucker. These values include academic leadership in Neuropsychiatry, commitment, mentoring, and scholarship. Recipients shall have demonstrated such values through a lifetime commitment to improving our understanding of brain-behavior relationships as they affect mental illness.

**The 2019 awardee is:**  
Barry Fogel, MD.

### **Fellow of the American Neuropsychiatric Association**

The designation of Fellow of the American Neuropsychiatric Association recognizes significant contributions to the field of neuropsychiatry, behavioral neurology, neuropsychology or the clinical neurosciences and to the Association.

#### **The individuals elected as a Fellow of ANPA in 2019 are:**

Gaston Baslet, MD, FANPA

Ronan Murphy, MD, FANPA

Michael Schrift, MD, FANPA

### **The Sidney R. Baer Jr. Career Development Award**

The ANPA Career Development Award Program recognizes an advanced trainee in neuropsychiatry, behavioral neurology or neuropsychology whose accomplishments during training offer promise of a successful career in neuropsychiatry and the clinical neurosciences.

**The 2019 awardee:**  
Aaron Boes, MD, PhD

### **ANPA Young Investigator Awards**

The ANPA Young Investigator Award recognizes early trainees who are embarking on promising careers in the clinical neurosciences. The recipients are chosen from the submitted presentations at the Annual Meeting. The decisions are based on the quality of the abstract submission and, more broadly, the candidate's perceived ability to make a contribution to the field with the encouragement and support provided by the award.

#### **The Young Investigator 2019 awardees:**

Ashley Holland, DO

Matthew J. Burke, MD, FRCPC

### **ANPA Clinical Neuroscience Trainee Award**

ANPA Clinical Neuroscience Trainee Award recognizes an outstanding trainee with special accomplishments or involvement in the clinical neurosciences. This award was designed to facilitate early involvement in ANPA by highly motivated residents in psychiatry or neurology, considering careers in neuropsychiatry or behavioral neurology, or doctoral candidates considering careers in neuropsychology.

**The Clinical Neuroscience Trainee 2019 awardee:**  
Kathy Niu, MD

# The American Psychiatric Association Publishing Textbook of Neuropsychiatry and Clinical Neurosciences, Sixth Edition

*Edited by David B. Arciniegas, M.D., Stuart C. Yudofsky, M.D.,  
and Robert E. Hales, M.D., M.B.A.*

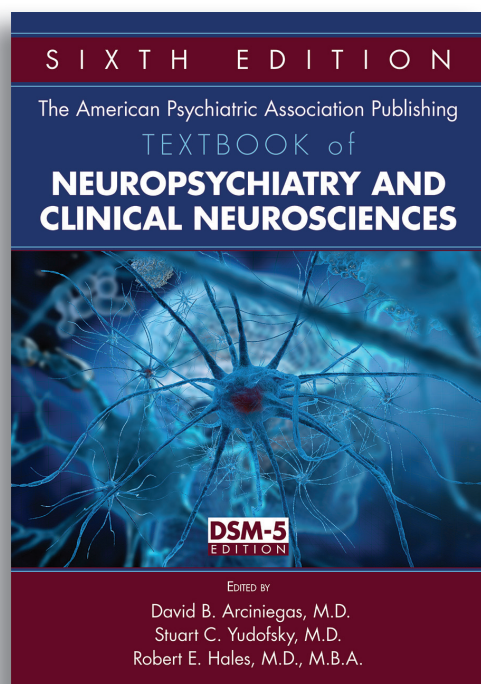

For more than three decades, the *Textbook of Neuropsychiatry and Clinical Neurosciences* has been the gold standard for understanding the structural and functional foundations and rapidly evolving knowledge base of neuropsychiatric disorders. In the new edition, the esteemed editors have undertaken a complete reorganization, reconceptualizing the way the material is presented and integrating considerations of neuropsychiatric symptoms, syndromes, and treatments into chapters addressing the neuropsychiatry of neurodevelopmental disorders, acquired neurological conditions, neurodegenerative disorders, and primary psychiatric disorders.

The result is a text that flows easily and logically from general principles to specific diagnostic tools and conditions, making it a clinically relevant and eminently practical guide for medical students and residents,

psychiatrists, neurologists, psychologists and neuropsychologists, as well as a broad range of professionals who work in diverse clinical settings.

The *Textbook of Neuropsychiatry and Clinical Neurosciences* provides comprehensive, current, and evidence-based coverage in a forward-looking volume to train a new generation of clinicians in this important work.

2018 • 624 pages • ISBN 978-1-58562-487-4 • Hardcover • \$220.00 • Item #62487  
2018 • 624 pages • ISBN 978-1-61537-187-7 • eBook • \$207.00 • Item #37187

AMERICAN  
PSYCHIATRIC  
ASSOCIATION  
PUBLISHING

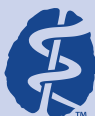

Order online @ [appi.org](http://appi.org)  
or Call Toll Free: 1-800-368-5777  
Email: [appi@psych.org](mailto:appi@psych.org)

20% Discount for American Psychiatric Association Members  
25% Discount for APA Resident-Fellow Members

Priority Code AH1834A

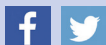

# American Neuropsychiatric Association

The American Neuropsychiatric Association (ANPA), established in 1988, is an organization of professionals in neuropsychiatry, behavioral neurology, neuropsychology and the clinical neurosciences. Our mission is to improve the lives of people with disorders at the interface of psychiatry and neurology.

Our diverse membership is comprised of professionals in all areas of neuroscience who share clinical and/or academic interests in neuropsychiatry. *The Journal of Neuropsychiatry and Clinical Neurosciences (JNCN)* is the official publication of the organization, and a subscription is a benefit of membership.

ANPA holds an annual scientific meeting that provides the opportunity for attendees to earn continuing education and maintenance of certification credits, as well as the opportunity for collaboration among educators, clinicians, researchers, students and trainees during research presentations, symposia, workshops, and continuing education courses. Members are encouraged to submit their work for presentation at our annual meetings. Travel awards are available for promising trainee clinicians and investigators. Annual meeting abstracts and proceedings are published in *The Journal of Neuropsychiatry and Clinical Neurosciences (JNCN)*, the official publication of the organization.

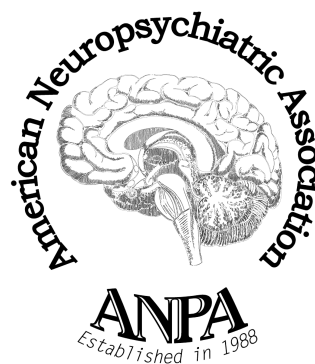

## Benefits of Membership ←

- Subscription to *The Journal of Neuropsychiatry and Clinical Neurosciences (JNCN)*
- Discounts on subscriptions to PsychiatryOnline.com including DSM Premium and DSM Premium Plus
- Opportunities for presenting at the annual meeting with accepted abstracts published in the *JNCN*
- Significantly reduced registration fees to the annual meeting
- Discounted membership and meeting registration fees for trainees and students
- Newsletters, news updates, information on job and training opportunities, research and meeting information on the ANPA web site: [www.anpaonline.org](http://www.anpaonline.org)
- Collaboration in clinical, educational and research activities with opportunities to interact with leaders in the field
- Complimentary video recordings of the annual meetings
- Access to educational slide sets assembled by the Education Committee
- Membership in Special Interest Groups (SIGs) designed to draw together ANPA members with similar clinical, research, and academic interests for the purposes of peer discussion, education, and potential collaboration

## Contact Information ←

Website: [www.anpaonline.org](http://www.anpaonline.org) • Email: [anpaoffice@gmail.com](mailto:anpaoffice@gmail.com)

## → Join ANPA Now!

## Don't miss ANPA's 31<sup>st</sup> Annual Meeting

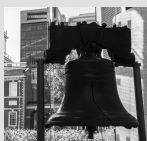

# Philadelphia

Pennsylvania, USA

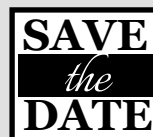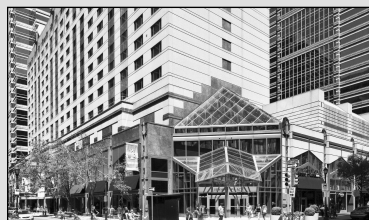

The Westin Philadelphia  
99 South 17<sup>th</sup> Street  
at Liberty Place

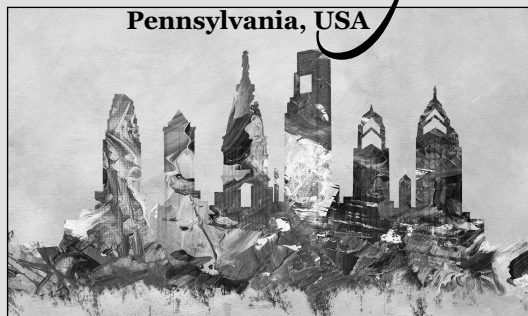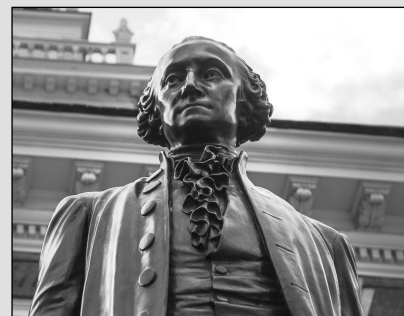

Join online at [www.anpaonline.org/join](http://www.anpaonline.org/join)

**MARCH 18-21, 2020**



*Ariella, an artist, musician, and real person living with schizophrenia*

SCHIZOPHRENIA  
DIAGNOSIS

EXPERIENCED  
SIDE EFFECTS

STARTED  
COLLEGE

STARTED  
MEDICATION

STOPPED  
MEDICATION

G  
R  
A  
D  
U  
A  
T  
I  
O  
N

# Schizophrenia shouldn't derail her life

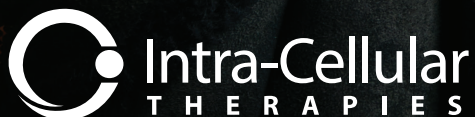

BUILT ON NOBEL PRIZE-WINNING SCIENCE

Visit [SZJourney.com](http://SZJourney.com) to learn more
