SUMMER 2019 | VOLUME 31 | NUMBER 3

The Journal of  
**Neuropsychiatry**  
and Clinical Neurosciences

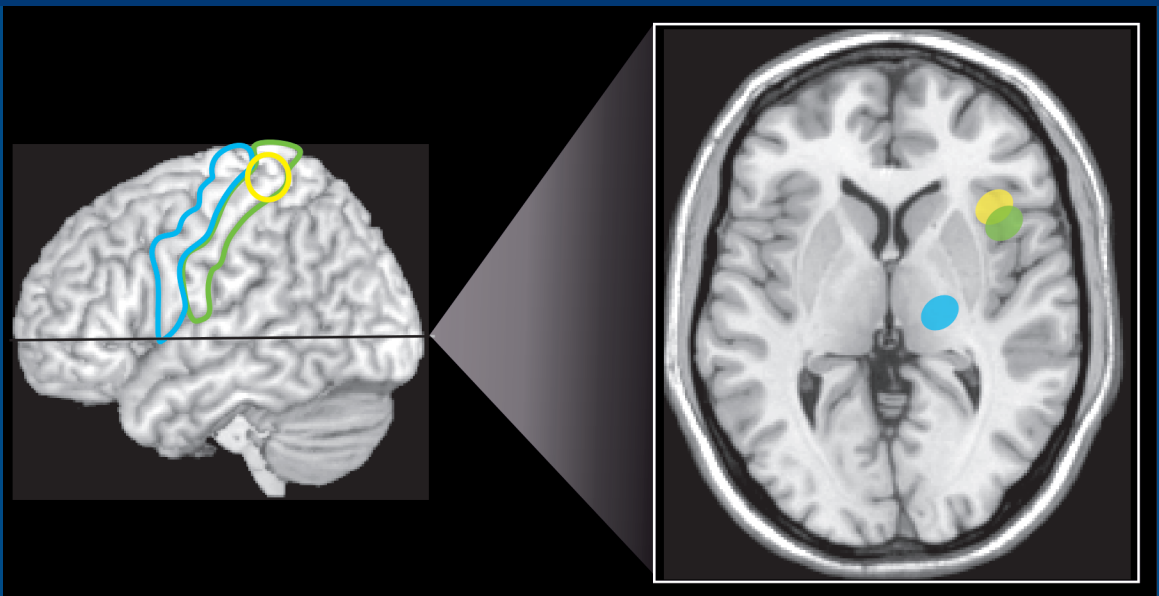

Systematic Literature Review of Quetiapine for the Treatment  
of Psychosis in Patients With Parkinsonism

Deep Brain Stimulation and Cognitive Outcomes Among Patients  
With Parkinson's Disease: A Historical Cohort Study

Pharmacotherapy Effectiveness in Treating Depression  
After Traumatic Brain Injury: A Meta-Analysis

Individualized Connectome-Targeted Transcranial Magnetic  
Stimulation for Neuropsychiatric Sequelae of Repetitive  
Traumatic Brain Injury in a Retired NFL Player

Progressive Dementia Revealing an Atypical Encephalitis:  
Neuroimaging Aspects

Official Journal of the American Neuropsychiatric Association  
[neuro.psychiatryonline.org](http://neuro.psychiatryonline.org)
